# Supplementary material
Source: ML conference proceedings conference paper supplement (https://openaccess.thecvf.com/content/CVPRW_2019/html/Sidorov_Changing_the_Image_CVPRW_2019_paper.html)
Supplement: Supplementary file 1 [file Sidorov_Changing_the_Image_CVPRW_2019_supplemental.pdf]

## 6. Appendix A

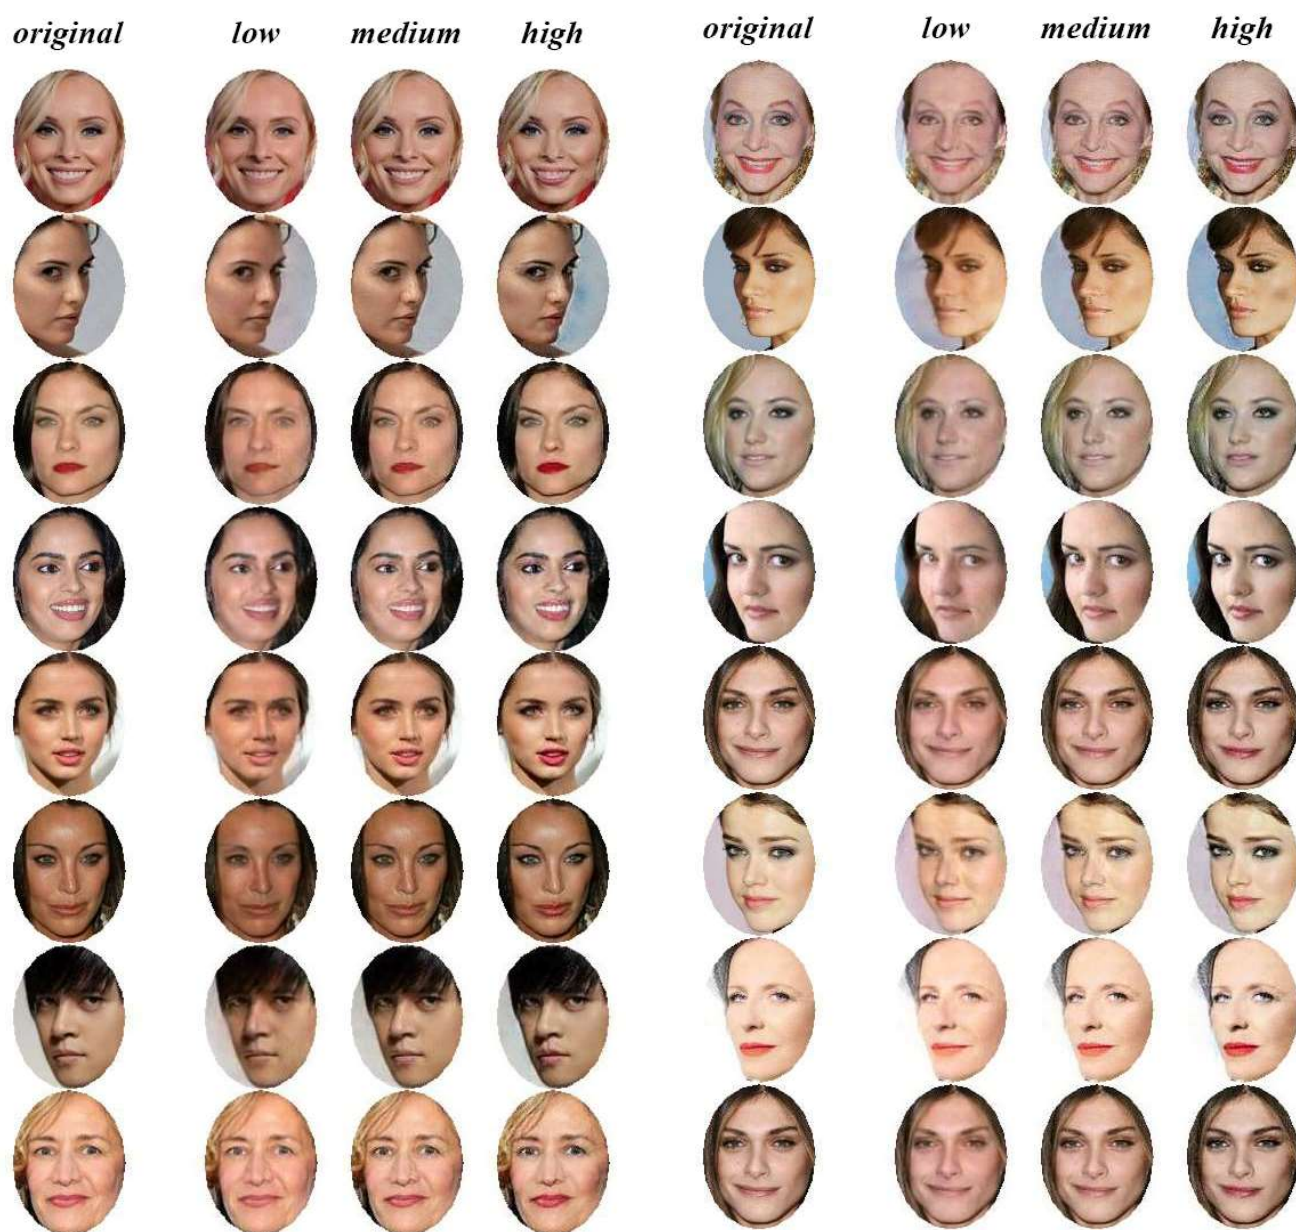

Figure 9: Additional examples of images with modified memorability.



## 7. Appendix B

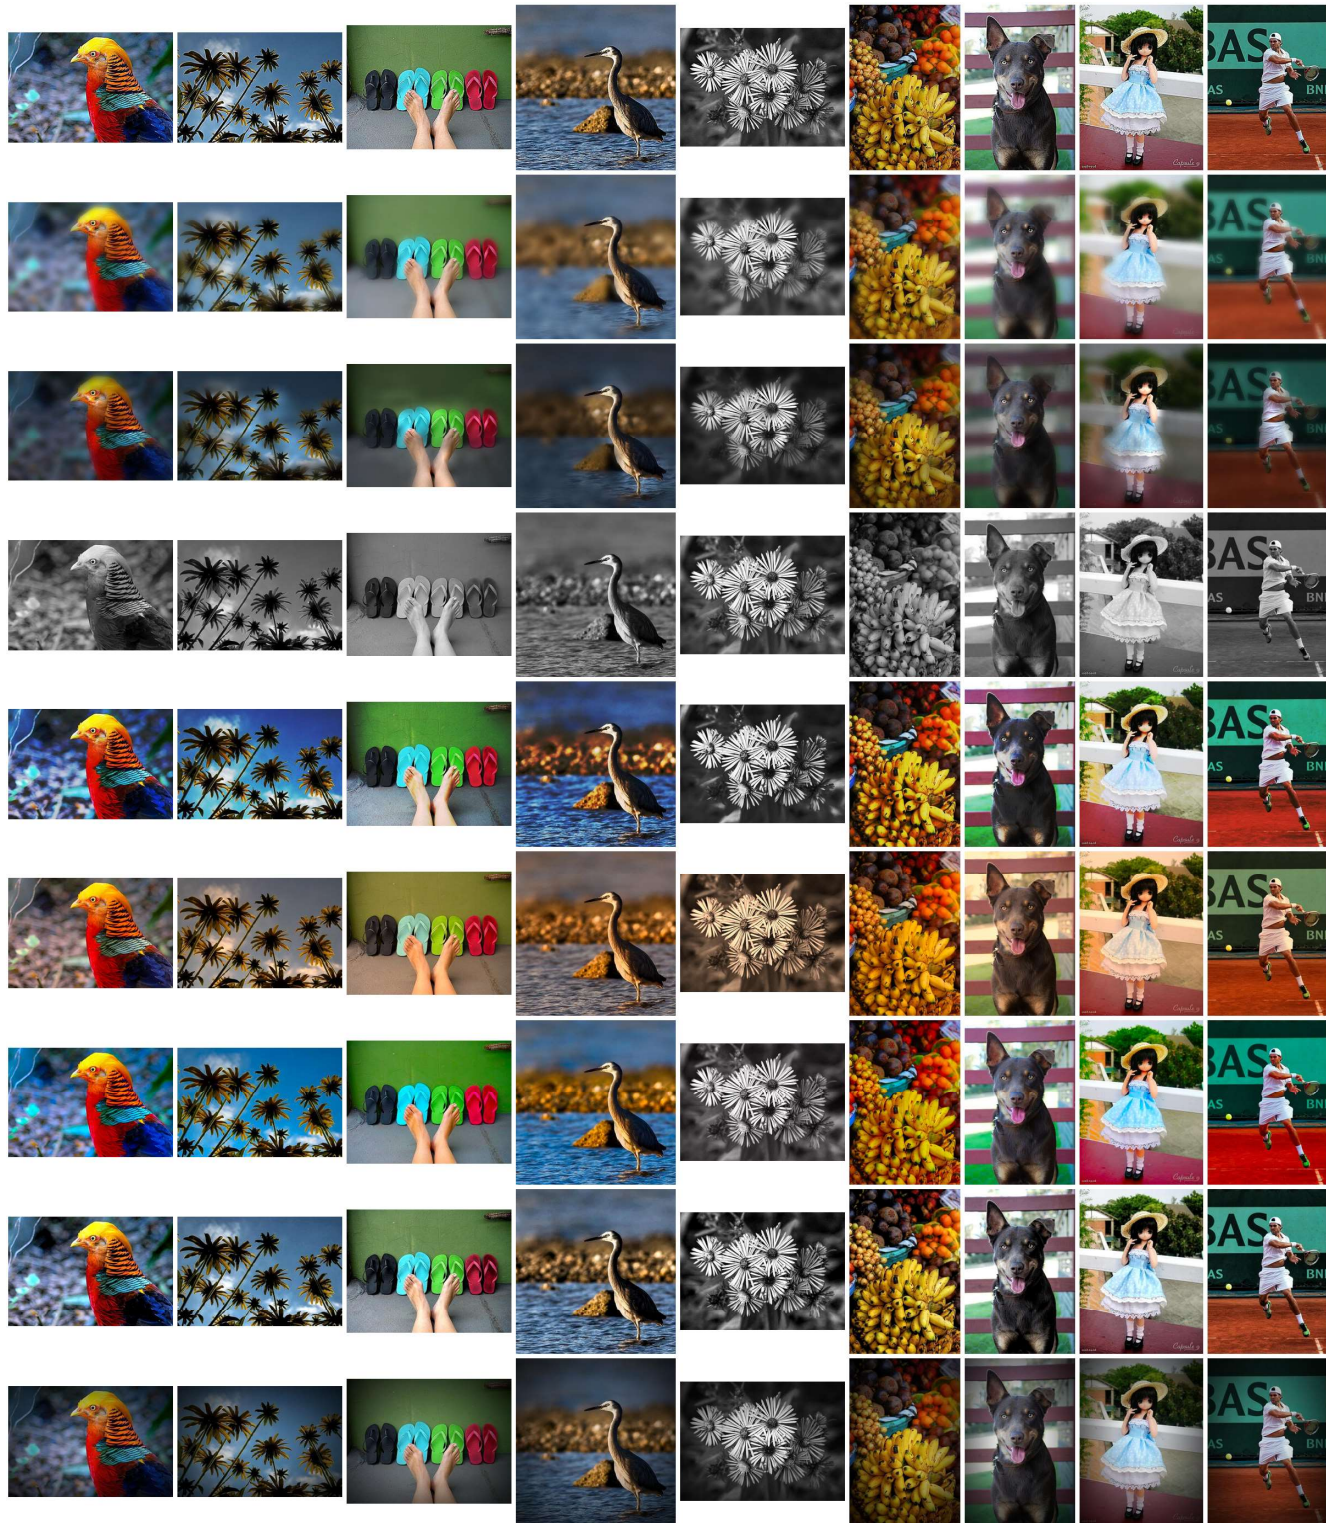

Figure 10: Demonstration of studied editing tools. Top to bottom: sharpening, BG blurring, BG blur + darkening, Grayscale, Contrast increasing, Color temperature (5000K), Vibrance (Saturation) increasing, Clarity ("Structure", local contrast) increasing, Vignetting.
